# Supplementary material for: Puerarin Induces Molecular Details of Ferroptosis-Associated Anti-Inflammatory on RAW264.7 Macrophages
Source: MDPI journal article supplement (doi:10.3390/metabo12070653), 2022-07-15
Supplement: s1 [file s1]

## Supplement file

### 2.2. Result of Network pharmacology

**Supplement Table S1:** The 51 potential anti-inflammatory targets of puerarin

| Gene symbol     | Uniprot ID    | Protein name                                           | Degree   |
|-----------------|---------------|--------------------------------------------------------|----------|
| <i>Akt1</i>     | P31750        | RAC-alpha serine/threonine-protein kinase              | 30       |
| <i>Jun</i>      | P05627        | Transcription factor Jun                               | 26       |
| <i>Stat3</i>    | P42227        | Signal transducer and activator of transcription 3     | 24       |
| <i>Esr1</i>     | P19785        | Estrogen receptor                                      | 20       |
| <i>Hsp90aa1</i> | P07901        | Heat shock protein HSP 90-alpha                        | 20       |
| <i>Tnf</i>      | P06804        | Tumor necrosis factor                                  | 18       |
| <i>Rela</i>     | Q04207        | Transcription factor p65                               | 16       |
| <i>Casp3</i>    | P70677        | Caspase-3                                              | 12       |
| <i>Ar</i>       | P19091        | Androgen receptor                                      | 10       |
| <i>Mapk9</i>    | Q9WTU6        | Mitogen-activated protein kinase 9                     | 10       |
| <i>Fos</i>      | P01101        | Protein c-Fos                                          | 10       |
| <i>Esr2</i>     | O08537        | Estrogen receptor beta                                 | 10       |
| <b>Ahr</b>      | <b>P30561</b> | <b>Aryl hydrocarbon receptor</b>                       | <b>8</b> |
| <i>Bcl2</i>     | P10417        | Apoptosis regulator Bcl-2                              | 8        |
| <i>Hif1a</i>    | Q61221        | Hypoxia-inducible factor 1-alpha                       | 8        |
| <i>Bad</i>      | Q61337        | Bcl2-associated agonist of cell death                  | 8        |
| <i>Nos3</i>     | P70313        | Nitric oxide synthase, endothelial                     | 8        |
| <i>Prkaca</i>   | P05132        | cAMP-dependent protein kinase catalytic subunit alpha  | 8        |
| <i>Cyp1a2</i>   | P00186        | Cytochrome P450 1A2                                    | 6        |
| <i>Ptpn1</i>    | P35821        | Tyrosine-protein phosphatase non-receptor type 1       | 6        |
| <i>Nos2</i>     | P29477        | Nitric oxide synthase, inducible                       | 6        |
| <i>Casp9</i>    | Q8C3Q9        | Caspase-9                                              | 6        |
| <i>Gsk3b</i>    | Q9WV60        | Glycogen synthase kinase-3 beta                        | 6        |
| <b>Alox15</b>   | <b>P39654</b> | <b>Polyunsaturated fatty acid lipooxygenase ALOX15</b> | <b>6</b> |
| <i>Casp8</i>    | O89110        | Caspase-8                                              | 6        |
| <i>Pparg</i>    | P37238        | Peroxisome proliferator-activated receptor gamma       | 6        |
| <i>Nfkbia</i>   | Q9Z1E3        | NF-kappa-B inhibitor alpha                             | 6        |
| <i>Tert</i>     | O70372        | Telomerase reverse transcriptase                       | 4        |
| <i>Birc5</i>    | O70201        | Baculoviral IAP repeat-containing protein 5            | 4        |
| <i>Fas</i>      | P25446        | Tumor necrosis factor receptor superfamily member 6    | 4        |
| <i>Lepr</i>     | P48356        | Leptin receptor                                        | 4        |
| <i>Prkce</i>    | P16054        | Protein kinase C epsilon type                          | 4        |
| <i>Timp2</i>    | P25785        | Metalloproteinase inhibitor 2                          | 4        |
| <i>Adora2a</i>  | Q60613        | Adenosine receptor A2a                                 | 2        |
| <i>Adora3</i>   | Q61618        | Adenosine receptor A3                                  | 2        |
| <i>Cdkn1b</i>   | P46414        | Cyclin-dependent kinase inhibitor 1B                   | 2        |
| <i>Aldh2</i>    | P47738        | Aldehyde dehydrogenase, mitochondrial                  | 2        |
| <i>Maoa</i>     | Q64133        | Amine oxidase [flavin-containing] A                    | 2        |
| <i>Ptgs1</i>    | P22437        | Prostaglandin G/H synthase 1                           | 2        |

| Gene symbol    | Uniprot ID | Protein name                                           | Degree |
|----------------|------------|--------------------------------------------------------|--------|
| <i>Ptgs2</i>   | Q05769     | Prostaglandin G/H synthase 2                           | 2      |
| <i>Bax</i>     | Q07813     | Apoptosis regulator BAX                                | 2      |
| <i>Cyp19a1</i> | P28649     | Aromatase                                              | 2      |
| <i>Xdh</i>     | Q00519     | Xanthine dehydrogenase/oxidase                         | 2      |
| <i>Dnmt1</i>   | P13864     | DNA (cytosine-5)-methyltransferase 1                   | 2      |
| <i>Nr2f2</i>   | P43135     | COUP transcription factor 2                            | 2      |
| <i>Ripk2</i>   | P58801     | Receptor-interacting serine/threonine-protein kinase 2 | 2      |
| <i>Ifna1</i>   | P01572     | Interferon alpha-1                                     | 2      |
| <i>Jak3</i>    | Q62137     | Tyrosine-protein kinase JAK3                           | 2      |
| <i>Mmp2</i>    | P33434     | 72 kDa type IV collagenase                             | 2      |
| <i>Mmp9</i>    | P41245     | Matrix metalloproteinase-9                             | 2      |
| <i>Vcam1</i>   | P29533     | Vascular cell adhesion protein 1                       | 2      |

**Supplement Table S2:** A total of 136 KEGG pathways enriched by network pharmacology analysis

| Term     | pathway                                              | PValue      | Fold Enrichment | FDR         |
|----------|------------------------------------------------------|-------------|-----------------|-------------|
| mmu05200 | Pathways in cancer                                   | 9.73089E-34 | 20.48099675     | 8.85511E-32 |
| mmu05417 | Lipid and atherosclerosis                            | 4.02068E-28 | 36.80396929     | 1.82941E-26 |
| mmu05161 | Hepatitis B                                          | 6.55286E-25 | 41.49211781     | 1.9877E-23  |
| mmu05162 | Measles                                              | 4.71186E-24 | 44.65639317     | 1.07195E-22 |
| mmu04210 | Apoptosis                                            | 4.66967E-19 | 39.92998659     | 8.49881E-18 |
| mmu04933 | AGE-RAGE signaling pathway in diabetic complications | 5.70982E-19 | 49.57004161     | 8.65989E-18 |
| mmu01522 | Endocrine resistance                                 | 1.4596E-17  | 49.90547798     | 1.89748E-16 |
| mmu05167 | Kaposi sarcoma-associated herpesvirus infection      | 2.03694E-17 | 25.37000887     | 2.31702E-16 |
| mmu05169 | Epstein-Barr virus infection                         | 2.47528E-17 | 25.0433564      | 2.50279E-16 |
| mmu04668 | TNF signaling pathway                                | 1.41912E-16 | 41.58789832     | 1.2914E-15  |
| mmu05207 | Chemical carcinogenesis - receptor activation        | 6.89266E-16 | 23.88824525     | 5.70211E-15 |
| mmu04657 | IL-17 signaling pathway                              | 8.85776E-16 | 46.55666522     | 6.71713E-15 |
| mmu05170 | Human immunodeficiency virus 1 infection             | 1.76735E-15 | 22.32819658     | 1.23714E-14 |
| mmu05145 | Toxoplasmosis                                        | 5.40134E-15 | 39.78478664     | 3.51087E-14 |
| mmu04932 | Non-alcoholic fatty liver disease                    | 7.95908E-15 | 30.00645828     | 4.82851E-14 |
| mmu05160 | Hepatitis C                                          | 1.66958E-14 | 28.22035957     | 9.49571E-14 |
| mmu05210 | Colorectal cancer                                    | 3.12258E-14 | 45.07452419     | 1.6715E-13  |
| mmu05152 | Tuberculosis                                         | 4.9902E-14  | 25.76641526     | 2.52282E-13 |
| mmu05215 | Prostate cancer                                      | 1.27736E-13 | 39.32973189     | 5.97384E-13 |
| mmu05163 | Human cytomegalovirus infection                      | 1.31293E-13 | 19.48745911     | 5.97384E-13 |
| mmu05418 | Fluid shear stress and                               | 2.01725E-13 | 28.79162191     | 8.74142E-13 |

| Term     | pathway                                           | PValue      | Fold Enrichment | FDR         |
|----------|---------------------------------------------------|-------------|-----------------|-------------|
|          | atherosclerosis                                   |             |                 |             |
| mmu04926 | Relaxin signaling pathway                         | 1.63423E-12 | 30.62315002     | 6.75979E-12 |
| mmu04915 | Estrogen signaling pathway                        | 2.76319E-12 | 29.06980183     | 1.05839E-11 |
| mmu05132 | Salmonella infection                              | 2.79137E-12 | 18.37604809     | 1.05839E-11 |
| mmu05222 | Small cell lung cancer                            | 3.94347E-12 | 37.59730696     | 1.43542E-11 |
| mmu04936 | Alcoholic liver disease                           | 4.2399E-12  | 27.85856009     | 1.48396E-11 |
| mmu05142 | Chagas disease                                    | 9.70006E-12 | 34.08353996     | 3.26928E-11 |
| mmu05165 | Human papillomavirus infection                    | 1.04494E-11 | 13.7992278      | 3.39606E-11 |
| mmu04659 | Th17 cell differentiation                         | 1.3563E-11  | 32.85530428     | 4.25598E-11 |
| mmu04931 | Insulin resistance                                | 1.4719E-11  | 32.56195335     | 4.46478E-11 |
| mmu04722 | Neurotrophin signaling pathway                    | 3.20342E-11 | 29.89294078     | 9.40359E-11 |
| mmu04217 | Necroptosis                                       | 3.71809E-11 | 22.4113556      | 1.05733E-10 |
| mmu01524 | Platinum drug resistance                          | 5.4898E-11  | 39.07434402     | 1.51385E-10 |
| mmu04215 | Apoptosis - multiple species                      | 2.84814E-10 | 77.35930736     | 7.49476E-10 |
| mmu04620 | Toll-like receptor signaling pathway              | 2.8826E-10  | 31.86645532     | 7.49476E-10 |
| mmu05208 | Chemical carcinogenesis - reactive oxygen species | 3.68589E-10 | 17.75058696     | 9.3171E-10  |
| mmu05203 | Viral carcinogenesis                              | 4.75942E-10 | 17.29152006     | 1.17056E-09 |
| mmu05164 | Influenza A                                       | 8.56245E-10 | 20.72124304     | 2.05048E-09 |
| mmu05166 | Human T-cell leukemia virus 1 infection           | 1.06315E-09 | 15.91917719     | 2.48068E-09 |
| mmu04917 | Prolactin signaling pathway                       | 1.21486E-09 | 38.38882922     | 2.76381E-09 |
| mmu04071 | Sphingolipid signaling pathway                    | 1.45427E-09 | 26.04956268     | 3.22778E-09 |
| mmu05022 | Pathways of neurodegeneration - multiple diseases | 3.64598E-09 | 9.856591285     | 7.89963E-09 |
| mmu05205 | Proteoglycans in cancer                           | 4.06043E-09 | 17.36637512     | 8.593E-09   |
| mmu04621 | NOD-like receptor signaling pathway               | 4.78976E-09 | 17.04176998     | 9.9061E-09  |
| mmu05010 | Alzheimer disease                                 | 5.22756E-09 | 11.19265097     | 1.05713E-08 |
| mmu04660 | T cell receptor signaling pathway                 | 1.11579E-08 | 28.0533752      | 2.20732E-08 |
| mmu04625 | C-type lectin receptor signaling pathway          | 1.99206E-08 | 25.81903558     | 3.85697E-08 |
| mmu04066 | HIF-1 signaling pathway                           | 2.85471E-08 | 24.51723547     | 5.41206E-08 |
| mmu05140 | Leishmaniasis                                     | 3.12912E-08 | 36.46938776     | 5.81123E-08 |
| mmu05168 | Herpes simplex virus 1 infection                  | 3.33197E-08 | 9.351125065     | 6.06419E-08 |
| mmu04151 | PI3K-Akt signaling pathway                        | 3.66484E-08 | 10.99077439     | 6.53922E-08 |

| Term     | pathway                                                | PValue      | Fold Enrichment | FDR         |
|----------|--------------------------------------------------------|-------------|-----------------|-------------|
| mmu04920 | Adipocytokine signaling pathway                        | 4.03808E-08 | 34.97064579     | 7.06664E-08 |
| mmu04380 | Osteoclast differentiation                             | 5.55148E-08 | 22.27138184     | 9.40156E-08 |
| mmu05212 | Pancreatic cancer                                      | 5.57894E-08 | 33.15398887     | 9.40156E-08 |
| mmu05133 | Pertussis                                              | 6.51427E-08 | 32.31464738     | 1.07781E-07 |
| mmu05135 | Yersinia infection                                     | 7.18709E-08 | 21.45258103     | 1.1679E-07  |
| mmu05235 | PD-L1 expression and PD-1 checkpoint pathway in cancer | 1.2472E-07  | 29.00974026     | 1.99114E-07 |
| mmu04024 | cAMP signaling pathway                                 | 1.31854E-07 | 14.65287901     | 2.06875E-07 |
| mmu05134 | Legionellosis                                          | 6.51126E-07 | 35.29295589     | 1.00428E-06 |
| mmu04062 | Chemokine signaling pathway                            | 8.34126E-07 | 14.9618001      | 1.26509E-06 |
| mmu04919 | Thyroid hormone signaling pathway                      | 9.55655E-07 | 20.5875576      | 1.42565E-06 |
| mmu04010 | MAPK signaling pathway                                 | 1.06709E-06 | 11.12625389     | 1.56621E-06 |
| mmu04622 | RIG-I-like receptor signaling pathway                  | 1.28665E-06 | 30.81920092     | 1.85849E-06 |
| mmu04115 | p53 signaling pathway                                  | 1.47839E-06 | 29.97483925     | 2.10208E-06 |
| mmu05223 | Non-small cell lung cancer                             | 1.58234E-06 | 29.56977386     | 2.21527E-06 |
| mmu05220 | Chronic myeloid leukemia                               | 2.05713E-06 | 28.0533752      | 2.83635E-06 |
| mmu01521 | EGFR tyrosine kinase inhibitor resistance              | 2.19173E-06 | 27.69826918     | 2.97682E-06 |
| mmu04662 | B cell receptor signaling pathway                      | 2.63752E-06 | 26.68491787     | 3.52962E-06 |
| mmu05224 | Breast cancer                                          | 2.90325E-06 | 17.01904762     | 3.82892E-06 |
| mmu04012 | ErbB signaling pathway                                 | 3.53609E-06 | 25.1513019      | 4.59692E-06 |
| mmu05171 | Coronavirus disease - COVID-19                         | 4.24056E-06 | 11.71707237     | 5.43508E-06 |
| mmu04658 | Th1 and Th2 cell differentiation                       | 4.65927E-06 | 23.78438332     | 5.8888E-06  |
| mmu05020 | Prion disease                                          | 7.21212E-06 | 10.80574452     | 8.99045E-06 |
| mmu04064 | NF-kappa B signaling pathway                           | 8.91314E-06 | 20.83965015     | 1.09607E-05 |
| mmu04935 | Growth hormone synthesis, secretion and action         | 1.57346E-05 | 18.54375649     | 1.90913E-05 |
| mmu05206 | MicroRNAs in cancer                                    | 1.66025E-05 | 9.503423519     | 1.98793E-05 |
| mmu05213 | Endometrial cancer                                     | 1.7474E-05  | 31.43912738     | 2.03864E-05 |
| mmu04370 | VEGF signaling pathway                                 | 1.7474E-05  | 31.43912738     | 2.03864E-05 |
| mmu05415 | Diabetic cardiomyopathy                                | 2.2771E-05  | 11.87375415     | 2.62298E-05 |
| mmu04726 | Serotonergic synapse                                   | 2.90763E-05 | 16.32957661     | 3.30743E-05 |
| mmu04728 | Dopaminergic synapse                                   | 3.588E-05   | 15.62973761     | 4.03096E-05 |
| mmu04910 | Insulin signaling pathway                              | 3.84025E-05 | 15.40960046     | 4.26174E-05 |
| mmu04140 | Autophagy - animal                                     | 4.38586E-05 | 14.98741963     | 4.8086E-05  |
| mmu05226 | Gastric cancer                                         | 5.15025E-05 | 14.49114745     | 5.57944E-05 |
| mmu05012 | Parkinson disease                                      | 7.46821E-05 | 9.597207304     | 7.99538E-05 |

| Term            | pathway                                                  | PValue             | Fold Enrichment    | FDR                |
|-----------------|----------------------------------------------------------|--------------------|--------------------|--------------------|
| mmu04630        | JAK-STAT signaling pathway                               | 9.2885E-05         | 12.79627641        | 9.82853E-05        |
| mmu04211        | Longevity regulating pathway                             | 9.88183E-05        | 20.26077098        | 0.000103362        |
| mmu05231        | Choline metabolism in cancer                             | 0.000148696        | 18.23469388        | 0.000153766        |
| mmu04510        | Focal adhesion                                           | 0.00021212         | 10.72629052        | 0.000216887        |
| mmu05146        | Amoebiasis                                               | 0.000214665        | 16.57699443        | 0.00021705         |
| mmu05030        | Cocaine addiction                                        | 0.000288973        | 30.39115646        | 0.000288973        |
| <b>mmu00330</b> | <b>Arginine and proline metabolism</b>                   | <b>0.000409757</b> | <b>27.0143613</b>  | <b>0.000409757</b> |
| mmu05014        | Amyotrophic lateral sclerosis                            | 0.000458446        | 6.862519201        | 0.000458446        |
| mmu04923        | Regulation of lipolysis in adipocytes                    | 0.000505911        | 25.1513019         | 0.000505911        |
| mmu04371        | Apelin signaling pathway                                 | 0.000509022        | 13.21354629        | 0.000509022        |
| mmu05321        | Inflammatory bowel disease                               | 0.000706801        | 22.44270016        | 0.000706801        |
| mmu04921        | Oxytocin signaling pathway                               | 0.000787358        | 11.76431863        | 0.000787358        |
| mmu04137        | Mitophagy - animal                                       | 0.000841451        | 21.14167406        | 0.000841451        |
| mmu05031        | Amphetamine addiction                                    | 0.000841451        | 21.14167406        | 0.000841451        |
| mmu05211        | Renal cell carcinoma                                     | 0.000914468        | 20.54613395        | 0.000914468        |
| mmu05221        | Acute myeloid leukemia                                   | 0.000914468        | 20.54613395        | 0.000914468        |
| mmu05225        | Hepatocellular carcinoma                                 | 0.001235737        | 10.41982507        | 0.001235737        |
| mmu04022        | cGMP-PKG signaling pathway                               | 0.001315698        | 10.24421004        | 0.001315698        |
| mmu05016        | Huntington disease                                       | 0.00131614         | 7.174305788        | 0.00131614         |
| mmu04914        | Progesterone-mediated oocyte maturation                  | 0.001931544        | 15.85625555        | 0.001931544        |
| mmu04912        | GnRH signaling pathway                                   | 0.001931544        | 15.85625555        | 0.001931544        |
| mmu05202        | Transcriptional misregulation in cancer                  | 0.003085805        | 8.10430839         | 0.003085805        |
| mmu04014        | Ras signaling pathway                                    | 0.003443528        | 7.859781844        | 0.003443528        |
| mmu04725        | Cholinergic synapse                                      | 0.003549135        | 12.79627641        | 0.003549135        |
| mmu04650        | Natural killer cell mediated cytotoxicity                | 0.003817888        | 12.46816675        | 0.003817888        |
| mmu04611        | Platelet activation                                      | 0.004908239        | 11.39668367        | 0.004908239        |
| mmu05143        | African trypanosomiasis                                  | 0.005419135        | 26.68491787        | 0.005419135        |
| mmu04068        | FoxO signaling pathway                                   | 0.005690459        | 10.80574452        | 0.005690459        |
| mmu04550        | Signaling pathways regulating pluripotency of stem cells | 0.006543527        | 10.27306697        | 0.006543527        |
| mmu04930        | Type II diabetes mellitus                                | 0.007666548        | 22.32819658        | 0.007666548        |
| <b>mmu00380</b> | <b>Tryptophan metabolism</b>                             | <b>0.00924984</b>  | <b>20.26077098</b> | <b>0.00924984</b>  |
| mmu01100        | Metabolic pathways                                       | 0.00993117         | 2.470217151        | 0.00993117         |
| mmu04934        | Cushing syndrome                                         | 0.010026841        | 8.787804278        | 0.010026841        |
| mmu04530        | Tight junction                                           | 0.010524774        | 8.631807753        | 0.010524774        |
| mmu04310        | Wnt signaling pathway                                    | 0.011210755        | 8.432228383        | 0.011210755        |
| mmu04340        | Hedgehog signaling pathway                               | 0.011324909        | 18.23469388        | 0.011324909        |
| mmu04141        | Protein processing in                                    | 0.011741887        | 8.288497217        | 0.011741887        |

| Term            | pathway                                             | PValue             | Fold Enrichment    | FDR                |
|-----------------|-----------------------------------------------------|--------------------|--------------------|--------------------|
|                 | endoplasmic reticulum                               |                    |                    |                    |
| mmu04913        | Ovarian steroidogenesis                             | 0.012432228        | 17.36637512        | 0.012432228        |
| mmu04623        | Cytosolic DNA-sensing pathway                       | 0.012811479        | 17.09502551        | 0.012811479        |
| mmu04664        | Fc epsilon RI signaling pathway                     | 0.013979265        | 16.32957661        | 0.013979265        |
| mmu00232        | Caffeine metabolism                                 | 0.016010784        | 121.5646259        | 0.016010784        |
| mmu05218        | Melanoma                                            | 0.016875664        | 14.78488693        | 0.016875664        |
| mmu05323        | Rheumatoid arthritis                                | 0.022864412        | 12.57565095        | 0.022864412        |
| <b>mmu00590</b> | <b>Arachidonic acid metabolism</b>                  | <b>0.024354042</b> | <b>12.15646259</b> | <b>0.024354042</b> |
| mmu05416        | Viral myocarditis                                   | 0.024859255        | 12.02287508        | 0.024859255        |
| mmu04020        | Calcium signaling pathway                           | 0.0277106          | 5.978588157        | 0.0277106          |
| mmu04928        | Parathyroid hormone synthesis, secretion and action | 0.034083886        | 10.13038549        | 0.034083886        |
| mmu04670        | Leukocyte transendothelial migration                | 0.040040276        | 9.271878243        | 0.040040276        |
| mmu04060        | Cytokine-cytokine receptor interaction              | 0.044670271        | 4.94500173         | 0.044670271        |
| mmu04750        | Inflammatory mediator regulation of TRP channels    | 0.046360102        | 8.547512755        | 0.046360102        |
| mmu04152        | AMPK signaling pathway                              | 0.048984697        | 8.288497217        | 0.048984697        |

### 2.3. Result of Metabolites

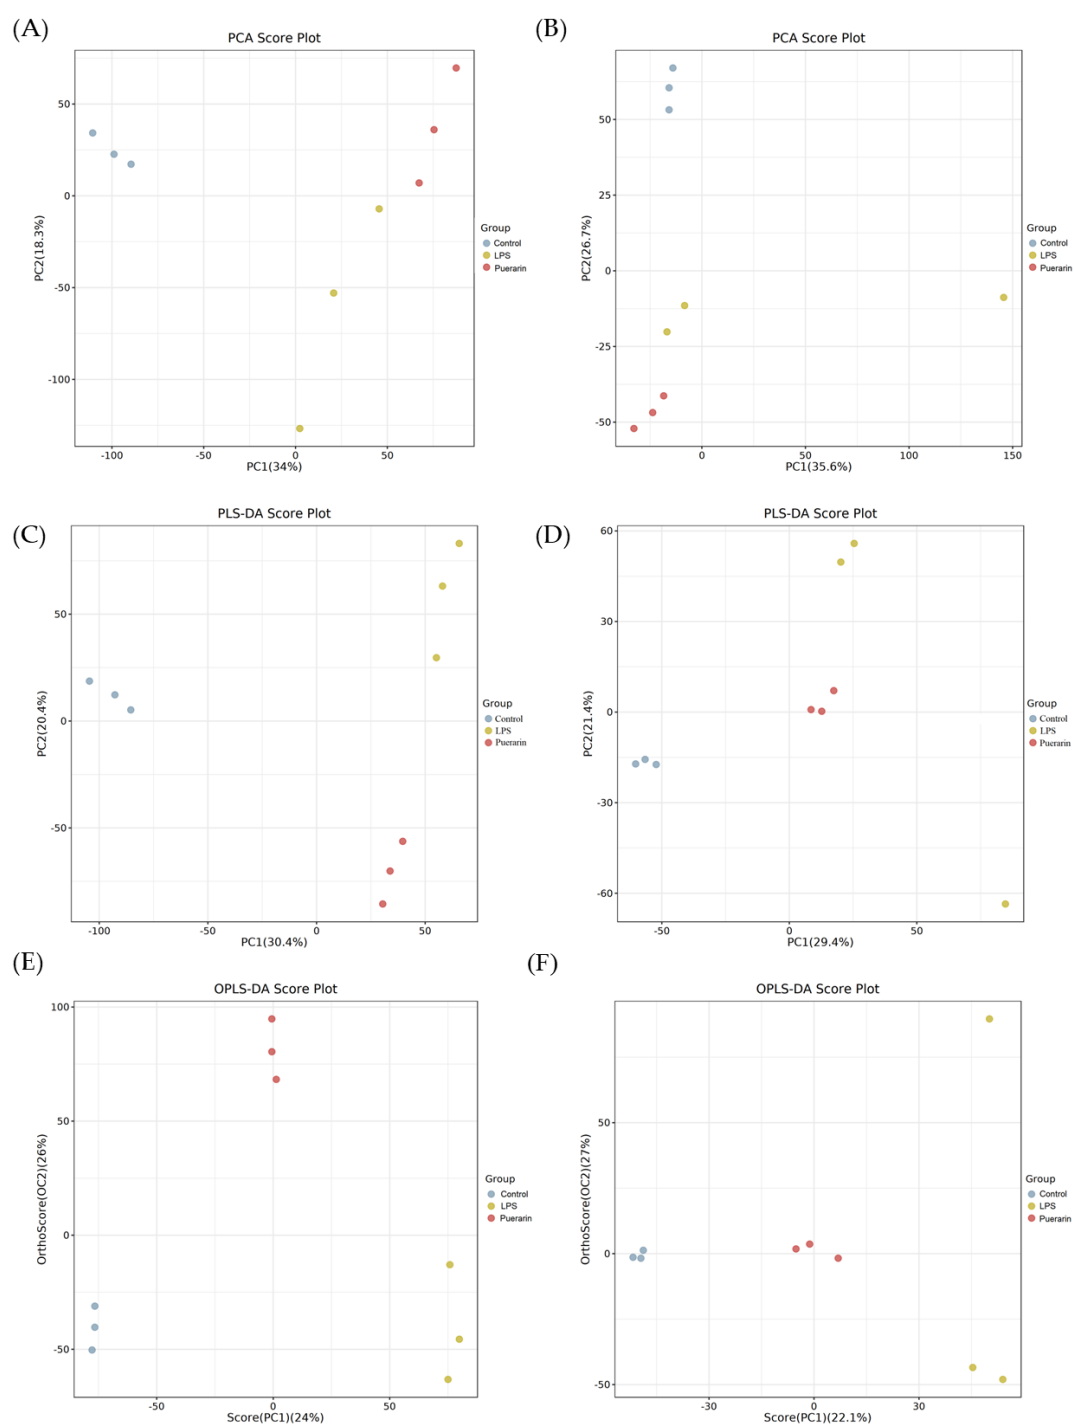

**Supplement Figure S1:** The PCA score plots of samples in positive ion mode (A) and in negative ion mode (B); The PLS-DA score plots of samples in positive ion mode (C) and in negative ion mode (D); The OPLS-DA score plots of samples in positive ion mode (E) and in negative ion mode (F).

**Supplement Table S3:** The KEGG pathways enriched by Metabolites analysis

| Category                             | KEGG pathway                                        | Pvalue         | Expected      |
|--------------------------------------|-----------------------------------------------------|----------------|---------------|
| Amino acid metabolism                | Phenylalanine, tyrosine and tryptophan biosynthesis | 0.14315        | 0.15139       |
|                                      | Valine, leucine and isoleucine biosynthesis         | 0.26611        | 0.30279       |
|                                      | Taurine and hypotaurine metabolism                  | 0.26611        | 0.30279       |
|                                      | Phenylalanine metabolism                            | 0.3717         | 0.45418       |
|                                      | <b>Arginine and proline metabolism</b>              | <b>0.42596</b> | <b>1.4382</b> |
|                                      | Aminoacyl-tRNA biosynthesis                         | 0.55058        | 1.8167        |
|                                      | Lysine degradation                                  | 0.62187        | 0.94622       |
|                                      | Alanine, aspartate and glutamate metabolism         | 0.6639         | 1.0598        |
|                                      | Valine, leucine and isoleucine degradation          | 0.79072        | 1.5139        |
|                                      | <b>Tryptophan metabolism</b>                        | <b>0.79886</b> | <b>1.5518</b> |
| Carbohydrate metabolism              | Selenocompound metabolism                           | 0.54007        | 0.75697       |
|                                      | Glutathione metabolism                              | 0.6639         | 1.0598        |
|                                      | Glyoxylate and dicarboxylate metabolism             | 0.34353        | 1.2112        |
|                                      | Amino sugar and nucleotide sugar metabolism         | 0.41255        | 1.4004        |
|                                      | Fructose and mannose metabolism                     | 0.50268        | 0.68127       |
|                                      | Citrate cycle (TCA cycle)                           | 0.54007        | 0.75697       |
|                                      | Pentose phosphate pathway                           | 0.57469        | 0.83267       |
|                                      | Pyruvate metabolism                                 | 0.57469        | 0.83267       |
| Lipid metabolism                     | Propanoate metabolism                               | 0.59102        | 0.87052       |
|                                      | Glycolysis / Gluconeogenesis                        | 0.63642        | 0.98406       |
|                                      | Ether lipid metabolism                              | 0.54007        | 0.75697       |
|                                      | Sphingolipid metabolism                             | 0.55771        | 0.79482       |
|                                      | <b>Arachidonic acid metabolism</b>                  | <b>0.75481</b> | <b>1.3625</b> |
| Metabolism of cofactors and vitamins | Glycerophospholipid metabolism                      | 0.75481        | 1.3625        |
|                                      | Primary bile acid biosynthesis                      | 0.8351         | 1.741         |
|                                      | Nicotinate and nicotinamide metabolism              | 0.016926       | 0.56773       |
| Nucleotide metabolism                | Folate biosynthesis                                 | 0.65042        | 1.0219        |
|                                      | Porphyrin and chlorophyll metabolism                | 0.68933        | 1.1355        |
|                                      | Pyrimidine metabolism                               | 0.18072        | 1.4761        |
|                                      | Purine metabolism                                   | 0.46083        | 2.498         |
